# Supplementary material
Source: ML conference proceedings conference paper supplement (https://proceedings.mlr.press/v139/li21p.html)
Supplement: Supplementary file 1 [file li21p-supp.zip]

Archive with 3 entries (3 files):
- afa.gif
- air.gif
- supp.pdf
