# Supplementary material
Source: ML conference proceedings conference paper supplement (https://proceedings.mlr.press/v139/li21p.html)

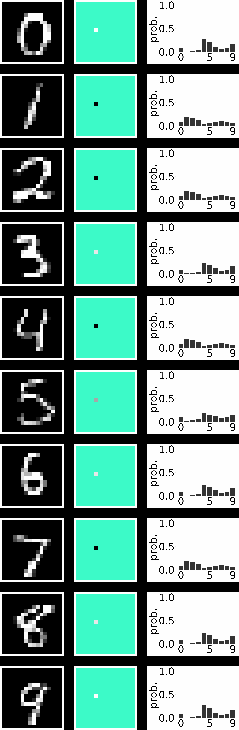

Supplement: Supplementary file 1 [file li21p-supp.zip › afa.gif]

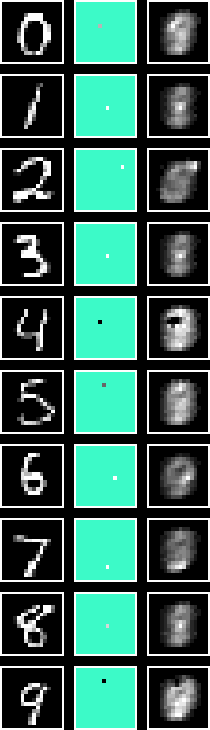

Supplement: Supplementary file 1 [file li21p-supp.zip › air.gif]
